# Supplementary material
Source: PubMed Central journal article supplement (PMC7179479)
Supplement: NIHMS1582800-supplement-1.pdf [file NIHMS1582800-supplement-1.pdf]

Current Biology, Volume 29

## Supplemental Information

### **LLG2/3 Are Co-receptors in BUPS/ANX-RALF**

#### **Signaling to Regulate *Arabidopsis* Pollen**

#### **Tube Integrity**

Zengxiang Ge, Yuling Zhao, Ming-Che Liu, Liang-Zi Zhou, Lele Wang, Sheng Zhong, Saiying Hou, Jiahao Jiang, Tianxu Liu, Qingpei Huang, Junyu Xiao, Hongya Gu, Hen-Ming Wu, Juan Dong, Thomas Dresselhaus, Alice Y. Cheung, and Li-Jia Qu

**Supplemental Information**

**LLG2/3 Are Co-receptors in BUPs/ANX-RALF**

**Signaling to Regulate *Arabidopsis* Pollen**

**Tube Integrity**

Zengxiang Ge, Yuling Zhao, Ming-Che Liu, Liang-Zi Zhou, Lele Wang, Sheng Zhong, Saiying Hou, Jiahao Jiang, Tianxu Liu, Qingpei Huang, Junyu Xiao, Hongya Gu, Hen-Ming Wu, Juan Dong, Thomas Dresselhaus, Alice Y. Cheung, and Li-Jia Qu

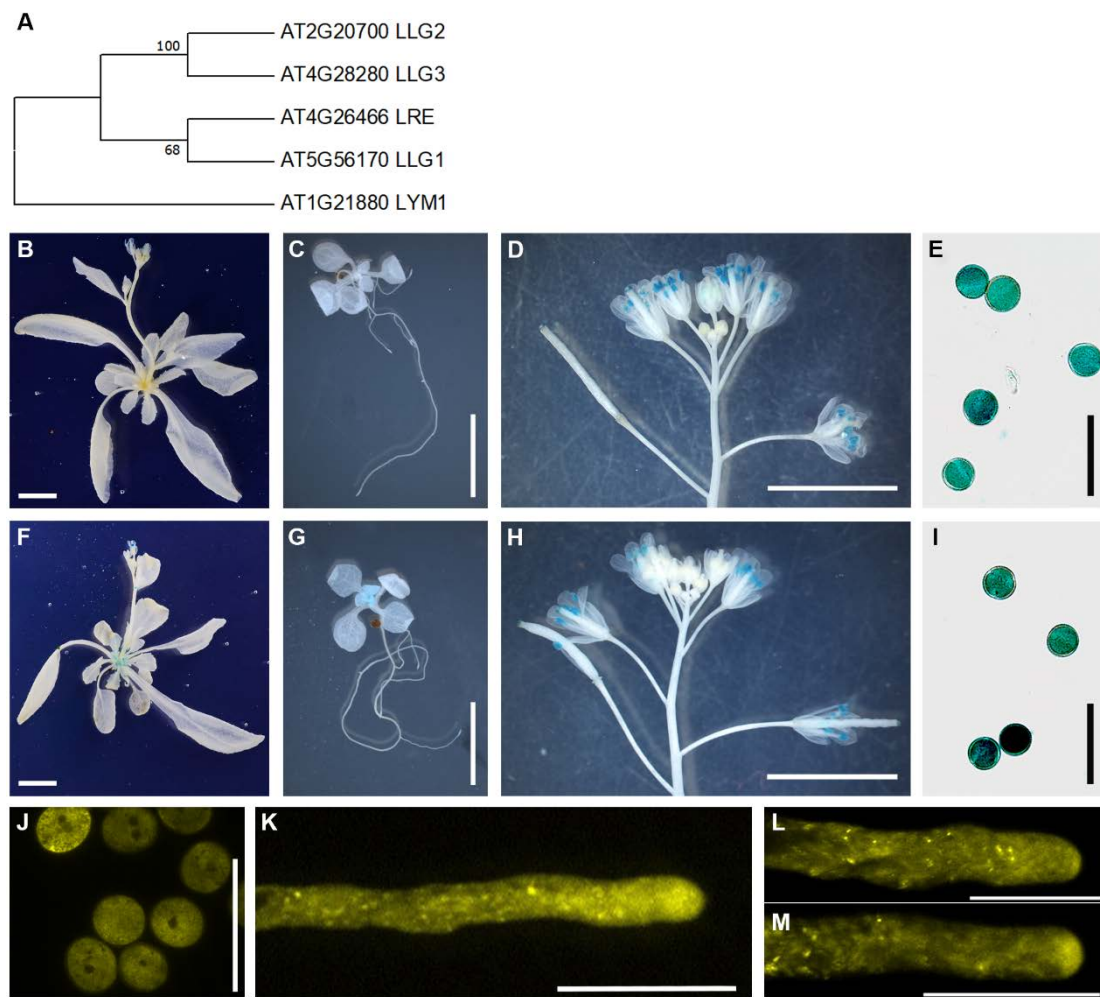

**Figure S1. Expression pattern of *LLG2* and *LLG3*. Related to Figure 1.**

**(A)** Phylogenetic analysis was conducted using Neighbor-joining method by MEGA6. Values on the tree are bootstrap values.

**(B-I)** Promoter activities of *LLG2* **(B-E)** and *LLG3* **(F-I)** in mature plants, inflorescences, mature pollen grains and young seedlings. Images are representative for more than 10 plants analyzed each except for **(B)** and **(F)**, where only three plants were observed in each group.

**(J-M)** Localization of YFP-*LLG3* protein in Arabidopsis pollen grain **(J)** and tube **(K)** using their endogenous promoters, and mCitrine-*LLG2* and mCitrine-*LLG3* in tobacco pollen tubes **(L-M)** using the *LAT52* promoter.

Scale bars: 1cm **(B and F)**, 5 mm **(C-D and G-H)**, 50  $\mu$ m **(E-J)**, 20  $\mu$ m **(K-M)**.

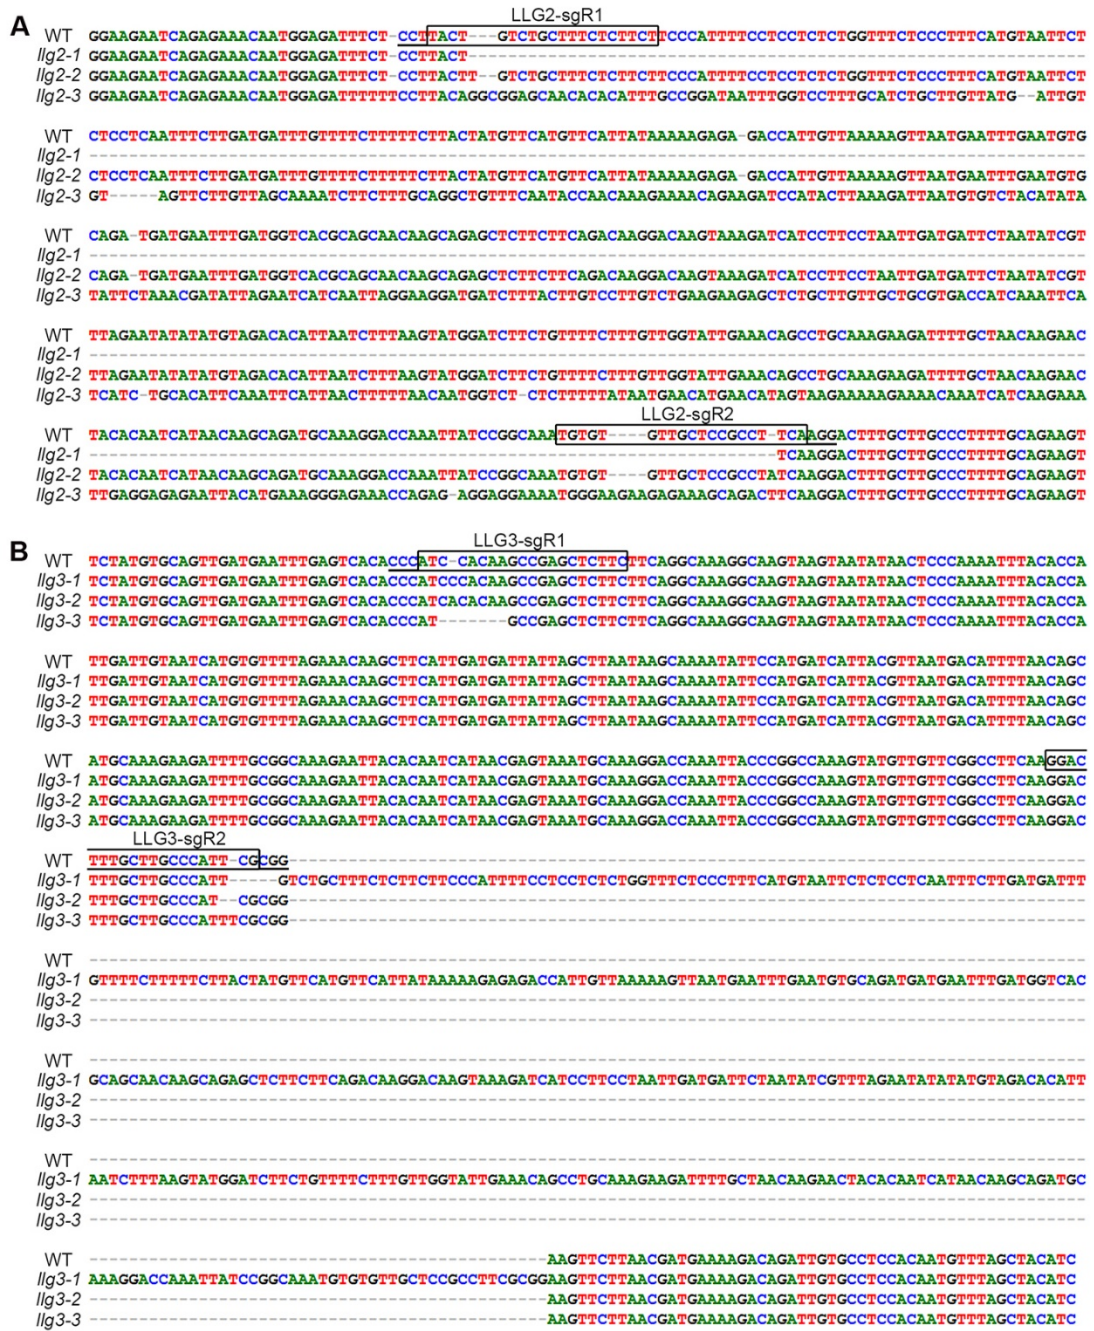

**Figure S2. Sequences alignment of WT and *llg2/llg3* mutants. Related to Figure 1.**

PCR products containing the CRISPR/Cas9 targets in *LLG2* (A) and *LLG3* (B) were amplified and sequenced to detect mutations. Sequences framed in black are sgRNAs within gene loci. The sequence alignment for each group was performed by MEGA6.

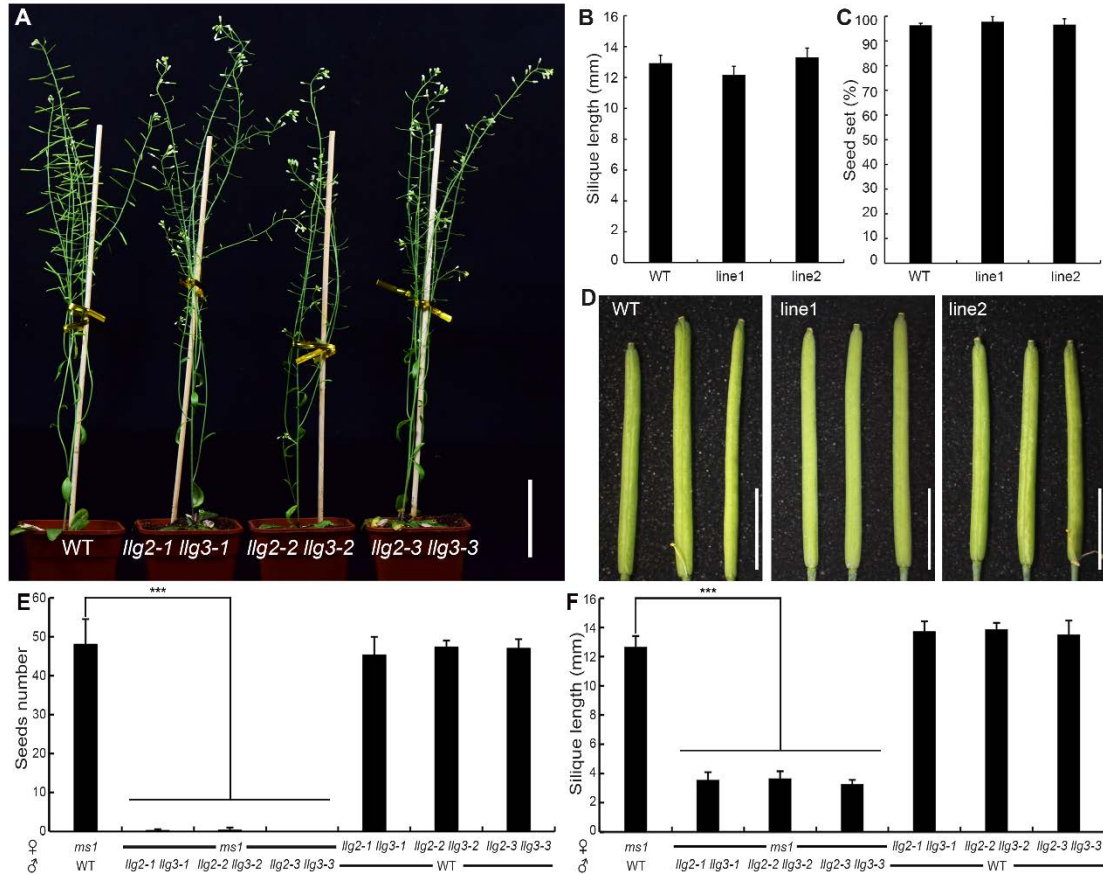

**Figure S3. LLAG2/3 contribute to plant fertility. Related to Figures 1 and 2.**

(A) *llg2 llg3* double mutants exhibit normal vegetative growth but show fertility defects. More than 20 plants were observed in each group.

(B-D) Complementary assay of *llg2 llg3* double mutant with exogenous LLAG2. Silique length (B) and seed set in the silique (C) of wild-type plants and *LLG2p::SP-GFP-LLG2* transgenic lines in the background of the *llg2 llg3* double mutant. Data are mean  $\pm$  SD of 5 siliques in each group. (D) Siliques of wild-type plants and transgenic lines.

(E-F) Fertility defects of *llg2 llg3* double mutants are male-specific. Silique length (E) and seed number per silique (F) of crossed plants shown in Figure 2A. Data are mean  $\pm$  SD of 9 siliques in each group. \*\*\*  $P < 0.001$  (Student's test).

Scale bars: 5.0 cm (A), 5.0 mm (D).



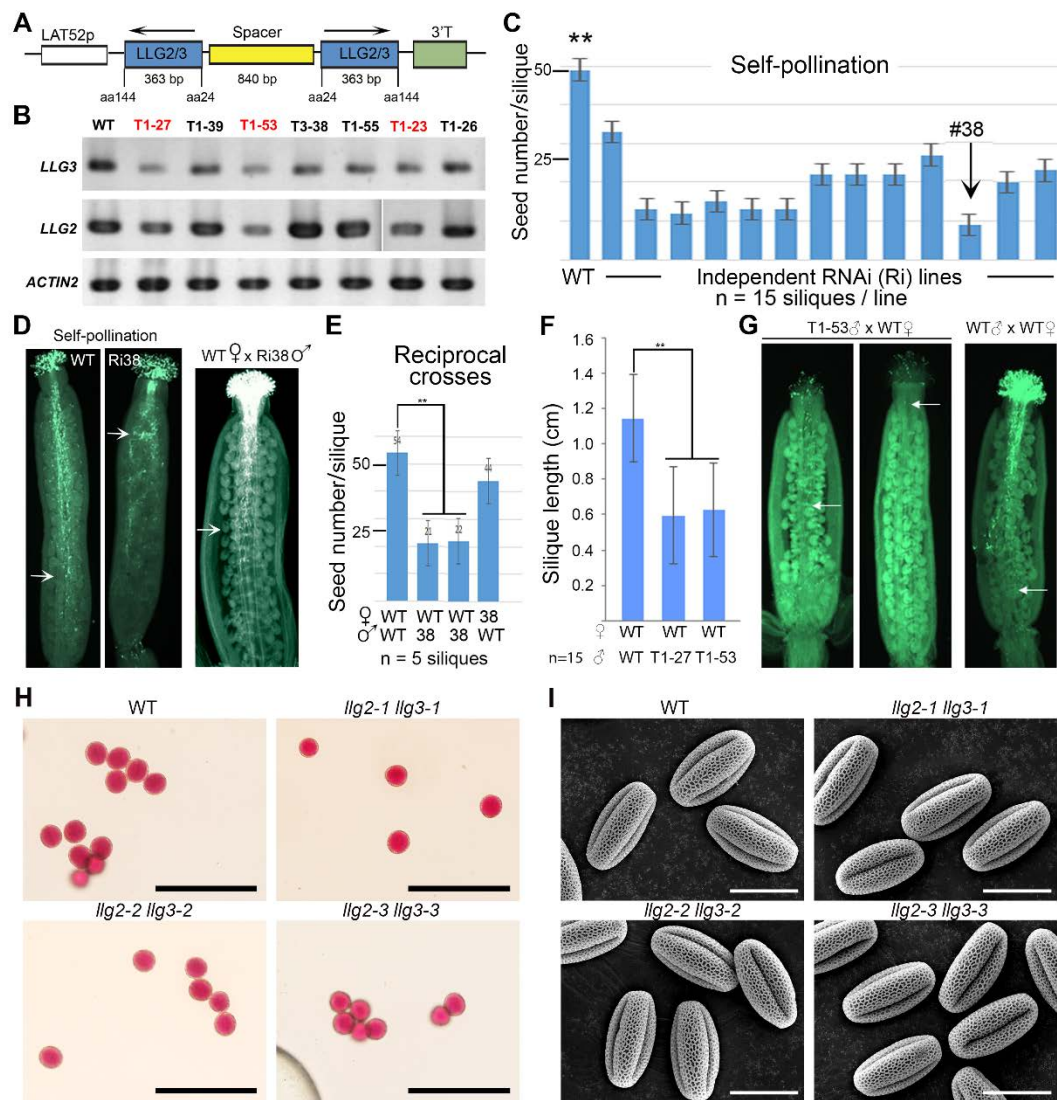

**Figure S4. *LLG2/3* mutants show reduced seed yield, but normal pollen grains. Related to Figure 2.**

(A) Schematic diagram of the *LLG2/3* RNAi construct. LAT52p was used as a pollen-specific promoter; 3'T indicates the transcription termination site; DNA sequence spanning amino acid residues 24-144 was used.

(B) Semi-quantitative RT-qPCR of *LLG2/3* RNAi mutants.

(C) Average seed yield per silique from independent T1 *LLG2/3* RNAi (Ri) lines. More than sixty T1 lines were generated. Seed yields are from lines that produced noticeably shorter siliques compared to wild type plants after self-pollination. \*\*, significantly different ( $p < 0.01$ ) from Ri lines.

**(D-E)** Pollen tube growth phenotype of *LLG2/3* RNAi line Ri-38. T3 plants was used.

**(D)** Pollen tube growth was reduced in self-pollinated Ri-38 pistil and also in a Ri-38 pollen to wild type pistil cross-pollination. **(E)** In reciprocal crosses, seed yields were reduced when Ri38 was used as pollen donor. \*\*, significantly different ( $p < 0.01$ ) from wild type self-pollination and crosses where Ri38 was the female donor.

**(F-G)** Reproductive phenotype of *LLG2/3* RNAi line Ri-53 and Ri-27. Ri-lines (T3 plants) were used as pollen donor to hand-pollinate WT pistils. **(F)** Silique lengths. **(G)** Pollen tube growth was reduced when Ri-53 was used as pollen donor on wild type pistil relative to using wild type as pollen donor. \*\*, significantly different ( $p < 0.01$ ).

Arrows in **(D)** and **(F)** locations of the longest pollen tubes.

**(H)** Alexander staining of *llg2 llg3* pollen grains. More than 500 pollen grains were observed in each group.

**(I)** Scanning electron microscope (SEM) of pollen grains of *llg2 llg3* double mutant. More than 100 pollen grains were observed in each group.

Scale bars, 100  $\mu\text{m}$  **(H)**, 20  $\mu\text{m}$  **(I)**.

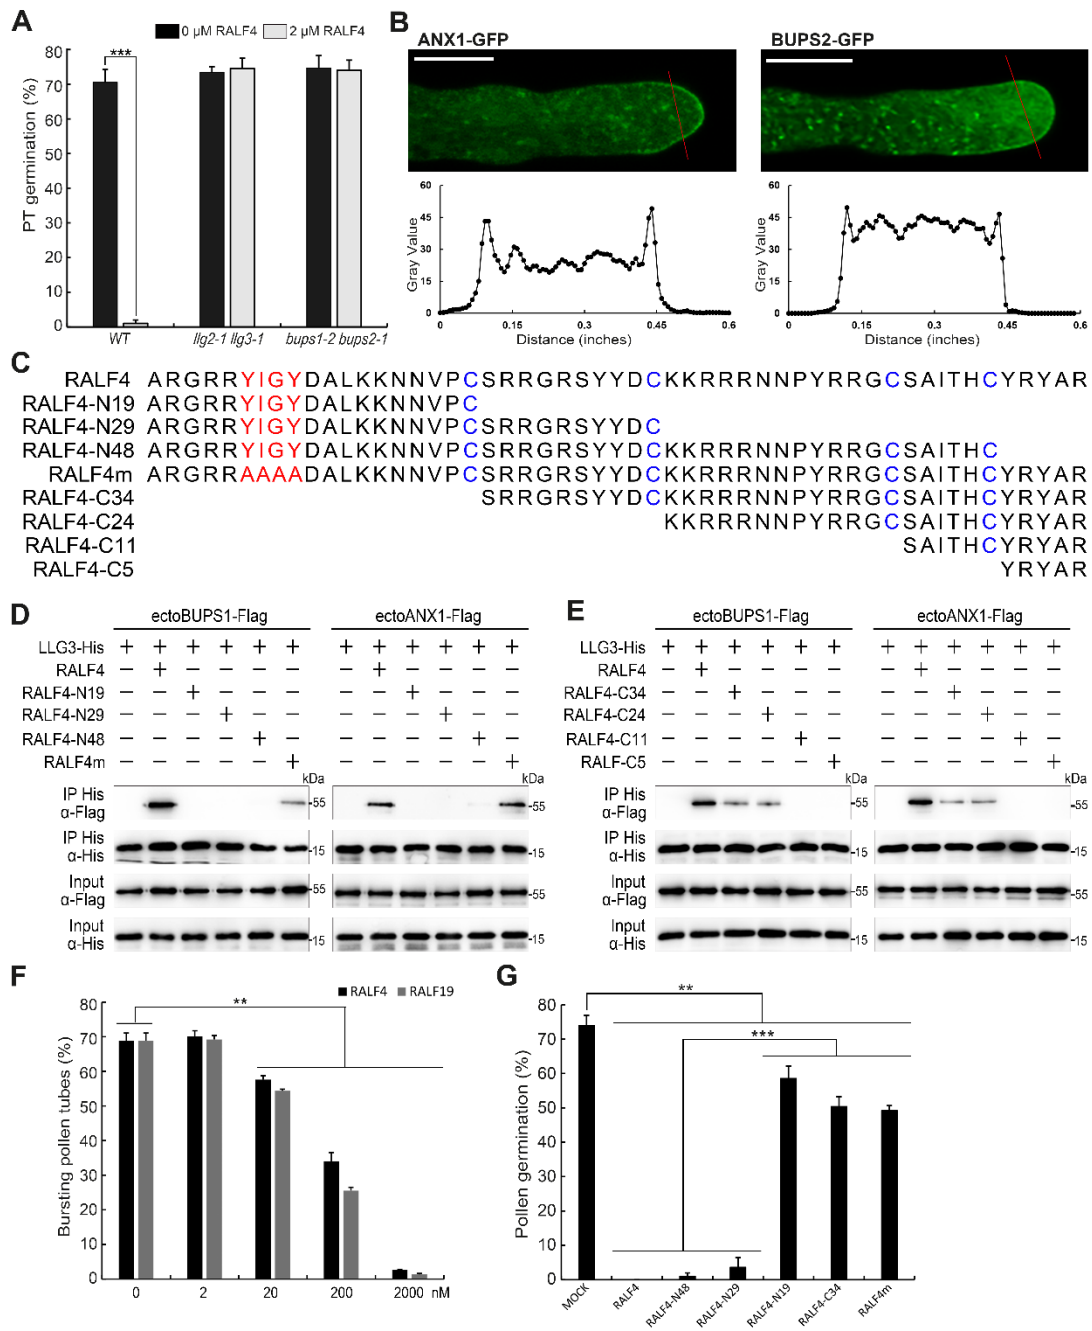

**Figure S5. *in vitro* RALF4 treatment of WT, *llg2 llg3*, *bups1 bups2* and *ralf4 ralf19* pollen tubes and the induction of RALF4 variants on association of LLG3 with BUPS1/ANX1. Related to Figure 5.**

(A) Pollen germination rate of WT, *llg2 llg3* and *bups1 bups2* with/without RALF4 treatment. Pollen grains were spread on pollen germination medium containing 2 μM RALF4 peptide. Quantitative analysis was conducted 7 hours after germination.

(B) Localization of ANX1-GFP and BUPS2-GFP using the *LAT52* promoter. Plot by



Image J at the bottom indicates the GFP signal along the red line. Scale bars, 10  $\mu$ m.

**(C)** Peptide sequence of RALF4 and RALF4 variants in Figure 5A and Figure S5.

**(D-E)** Pull-down assays with LLG3-His and Flag-tagged BUPS1/ANX1 ectodomains with and without the addition of WT or C-terminal **(D)** and N-terminal **(E)** mutated RALF4 variants (each 100 nM) as indicated. The ectoBUPS1/ANX1-Flag proteins purified from transgenic tobacco leaves and His-tagged LLG2/3 generated in *E. coli* were subjected to binding assays with Ni Sepharose. Western blots were probed with  $\alpha$ -Flag and  $\alpha$ -His antibodies, respectively.

Similar results were obtained in three independent experiments.

**(F-G)** Pollen tube burst effect of RALF4/19 on *ralf4 ralf19* and RALF4 variants on WT pollen tubes. **(F)** Pollen tube burst of *ralf4 ralf19* tubes depending on RALF4/19 peptide concentration. **(G)** Pollen germination of WT tubes in medium containing each 2  $\mu$ M of the RALF4 variants. Pollen tube bursting phenotypes (%) and pollen germination among the overall pollen on the medium were analyzed 7 hours after incubation. Data are mean  $\pm$  SD. More than 1500 pollen grains/tubes were analyzed in each group. \*\* P < 0.01; \*\*\* P < 0.001 (Student's test).

| <b>Purpose</b>                              | <b>Primer name</b>        | <b>Sequence (5'-3')</b>                                 |
|---------------------------------------------|---------------------------|---------------------------------------------------------|
| Promoter cloning                            | LLG2-Pro-F                | CACCTTGGTGGAGGATGAAGATGC                                |
|                                             | LLG2-Pro-R                | CATTGTTTCTCTGATTCTTCCTCT                                |
|                                             | LLG3-Pro-F                | CACCAAGGAGTGGTTGATTAACA                                 |
|                                             | LLG3-Pro-R                | CATGTTTTTGTTCCTCCTCTATT                                 |
| RT-PCR analysis of <i>LLG2/3</i> RNAi lines | LLG2-RT-F                 | ATGGAGATTTCTCCTTACTGTCTG                                |
|                                             | LLG2-RT-R                 | TCAAGACGATAAGAACAAAAG                                   |
|                                             | LLG3-RT-F                 | ATGAAGATTACTCATCATTGTTG                                 |
|                                             | LLG3-RT-R                 | TTAGAAGAGGTGAAACAAGATGGA                                |
| CRISPR/Cas9 mutant genotyping               | LLG2-SR-F                 | ACTGACACGGCGTCGTTTAGGCTAT                               |
|                                             | LLG2-SR-R                 | GGTAGAAAGAACC GCGAGAGATGCAGT                            |
|                                             | LLG2-CX                   | GGACTGGGTGACATCAGTGCAGTCA                               |
|                                             | LLG3-SR-F                 | TATGATCCGCTATATCCGCAGCA                                 |
|                                             | LLG3-SR-R                 | AGGTCGACTGGTAGAGTTATCGACACC                             |
|                                             | LLG3-CX                   | AAACGGTGATTAGCAAACCGTGTG                                |
| Protein expression in <i>E. coli</i>        | LLG2-mat-F                | CACCATGTATGATGAATTTGATGGTCACGC                          |
|                                             | LLG2-mat-R.SC             | TCAAGAAGTTGCGGATGCGGACT                                 |
|                                             | LLG3-mat-F                | CACCATGCATCACATCTCTTTGATGA                              |
|                                             | LLG3-mat-R.SC             | TTATGATGTAGGGGTGACGTCGG                                 |
|                                             | LLG1-mat-F                | CCCAAGCTTGGGATGAGTTTCATTT CAGATGGGGTC                   |
|                                             | LLG1-mat-R.SC             | CGGACTAGTCCGTCACGAGGTAGTTGCTGCGTTTA                     |
| Complementary assays                        | LLG2-C-F                  | CGGGGTACCCCGTGAAAGGGAGAAAACCAGAGAG                      |
|                                             | LLG2-C-R                  | GGCTGCTGCTGCTGCTGCTGCTGCTTGTAAATCTCTCCTCAATT<br>TC      |
|                                             | GFP-C-F                   | GATCTGGACGGGGTACCCCGATGGTGAGCAAGGGCGAGGA                |
|                                             | GFP-C-R                   | GCAGCAGCCCGCTCGAGCGGCTTGTACAGCTCGTCCATGC                |
| Protein localization in tobacco PT          | LLG2-F                    | CACCATGGAGATTTCTCCTTACTGTCTGCTTTCT                      |
|                                             | LLG2-R                    | TCAAGACGATAAGAACAAAAGACACAGAACG                         |
|                                             | LLG3-F                    | CACCATGGAGATTTCTCCTTACTGTCTGCTTTCT                      |
|                                             | LLG3-R                    | TTAGAAGAGGTGAAACAAGATGGAAACG                            |
|                                             | ANX1-F                    | CACCATGAGCGGGAAAACCTCGGAT                               |
|                                             | ANX1-R                    | TCGTCCTTTGGGATTTACAATCTG                                |
|                                             | BUPS2-F                   | CACCATGGAGATAAGAAAGAAACCAAACATAACC                      |
| BUPS2-R                                     | TCTTCCGTTAAGGCTAGCAAACCTG |                                                         |
| Protein localization in Arabidopsis         | LLG3-V-F                  | GGCTGCTGCTGCTGCTGCTGCTGCTCATCACATCTCTCTTGATG<br>AATTTG  |
|                                             | LLG3-V-R                  | CGGGGTACCCCGAGAGAAAGCGAATCCAGACAAAAGG                   |
|                                             | YFP-tag-F                 | GCTTTCTCTCGGGGTACCCCGATGGTGAGCAAGGGCGAGGAG              |
|                                             | YFP-tag-R                 | CAGCAGCAGCAGCAGCAGCCCGCTCGAGCGGCTTGTACAGCT<br>CGTCCATGC |

**Table S1. Primers used in the work. Related to STAR Methods.**
